# Supplementary material for: Re-Evaluating Botryosphaeriales: Ancestral State Reconstructions of Selected Characters and Evolution of Nutritional Modes
Source: MDPI journal article supplement (doi:10.3390/jof9020184), 2023-01-29
Supplement: s1 [file s1]

**Supplementary Table S1.** Nutritional mode variation and conidial characters (colour and septation) and GenBank accession numbers of the sequences used in phylogenetic analysis. Type strains are indicated in \*.

| Species                      | Strain no.     | Nutritional mode                 | Conidia character         |                   | GenBank accession numbers |           | References      |
|------------------------------|----------------|----------------------------------|---------------------------|-------------------|---------------------------|-----------|-----------------|
|                              |                |                                  | Colour                    | Septation         | ITS                       | LSU       |                 |
| Aplosporellaceae             |                |                                  |                           |                   |                           |           |                 |
| Alanomyces indica            | CBS 134264     | Saprobies                        | Not observed              |                   | HF563622                  | HF563623  | [37]            |
| Aplosporella africana        | CBS 121777     | Endophytes/ pathogens            | Pigmented                 | Aseptate          | EU101315                  | EU101380  | [104,105]       |
| A. artocarpi                 | CPC 22791      | Endophytes                       | Pigmented                 | Aseptate          | NR_154688                 | N/A       | [106]           |
| A. chromolaenae              | MFLUCC 17-1517 | Saprobies                        | Pigmented                 | Aseptate          | MT214340                  | NG_070506 | [107]           |
| A. ginkgonis                 | CFCC 52442     | Pathogens                        | Pigmented                 | Aseptate          | KM030583                  | KM030590  | [108]           |
| A. hesperidica               | CBS 732.79     | Pathogens                        | Pigmented                 | Aseptate          | KX464083                  | KX464239  | [109]           |
| A. javeedii                  | CFCC 89658     | Pathogens/ saprobies             | Pigmented                 | Aseptate          | KM030580                  | KM030587  | [104,105]       |
| A. longipes                  | CFCC 89661     | Saprobies/ pathogens             | Pigmented                 | Aseptate          | KM030583                  | KM030590  | [110]           |
| A. macropycnidia             | CGMCC 3.17725* | Saprobies                        | Pigmented                 | Aseptate          | NR_154707                 | N/A       | [104]           |
| A. papillata                 | CBS 121780     | Pathogens                        | Pigmented                 | Aseptate          | KF766197                  | EU101383  | [111]           |
| A. prunicola                 | CBS 121167     | Pathogens/ saprobies/ endophytes | Pigmented                 | Aseptate          | KF766147                  | KF766315  | [104,112,113]   |
| A. sophorae                  | CPC 29688      | Pathogens                        | Pigmented                 | Aseptate          | KY173388                  | KY173482  | [110]           |
| A. thailandica               | MFLU 16-0615*  | Saprobies                        | Pigmented                 | Aseptate          | NR_154722                 | N/A       | [36]            |
| A. yalgorensis               | MUCC 512       | Endophytes                       | Pigmented                 | Aseptate          | EF591927                  | EF591944  | [114]           |
| Botryosphaeriaceae           |                |                                  |                           |                   |                           |           |                 |
| Alanphillipsia aloicola      | CBS 138896     | Pathogens                        | Hyaline                   | Aseptate          | KP004444                  | KP004472  | [115]           |
| A. aloeigena                 | CPC 21286      | Pathogens                        | Hyaline                   | Aseptate          | KF777137                  | KF777193  | [110]           |
| A. aloes                     | CPC 21298      | Pathogens                        | Pigmented                 | Aseptate          | KF777138                  | KF777194  | [110]           |
| A. aloetica                  | CBS 136409     | Pathogens                        | Pigmented                 | Aseptate          | KF777139                  | KF777195  | [110]           |
| A. euphorbiae                | CPC 21628      | Pathogens                        | Pigmented                 | Aseptate          | KF777140                  | KF777196  | [110]           |
| Barriopsis archontophoenicis | MFLUCC 14-1164 | Saprobies                        | Pigmented                 | Aseptate          | KX235306                  | KX235307  | [116]           |
| B. iraniana                  | IRAN 1448C     | Endophytes                       | Pigmented                 | Aseptate/ septate | FJ919663                  | KF766318  | [117]           |
| B. stevensiana               | CBS 174.26     | Saprobies                        | Pigmented                 | Septate           | EU673330                  | DQ377857  | [11,19]         |
| B. tectonae                  | MFLUCC 12-0381 | Saprobies                        | Pigmented                 | Septate           | KJ556515                  | MH878606  | [33,118]        |
| B. thailandica               | MFLUCC 14-1190 | Saprobies                        | Pigmented                 | Septate           | KY115675                  | N/A       | [119]           |
| Botryobambusa fusicoccum     | MFLUCC 11-0143 | Saprobies                        | Hyaline                   | Aseptate          | JX646792                  | JX646809  | [11]            |
| B. fusicoccum                | MFLUCC 11-0657 | Saprobies                        | Hyaline                   | Aseptate          | JX646793                  | JX646810  | [11]            |
| Botryosphaeria agaves        | MFLUCC 11-0125 | Pathogen/ saprobies              | No asexual morph recorded |                   | JX646791                  | JX646808  | [11]            |
| B. agaves                    | MFLUCC 10-0051 | Pathogen/ saprobies              | No asexual morph recorded |                   | JX646790                  | JX646807  | [11]            |
| B. corticis                  | CBS 119047     | Pathogens                        | Hyaline                   | Aseptate          | DQ299245                  | EU673244  | [19]            |
| B. dothidea                  | CBS 115476     | Saprobies/ pathogens/ endophytes | Hyaline                   | Aseptate          | AY236949                  | DQ377852  | [11,24,120,121] |
| B. dothidea                  | CMW 25413      | Saprobies/                       | Hyaline                   | Aseptate          | KF766167                  | KF766332  | [111,122,123]   |

| endophytes                    |                |                                        |                              |                      |           |           |              |
|-------------------------------|----------------|----------------------------------------|------------------------------|----------------------|-----------|-----------|--------------|
| <i>B. dothidea</i>            | GZCC 16-0013*  | Saprobies                              | Hyaline                      | Septate              | KX447675  | N/A       | [124]        |
| <i>B. dothidea</i>            | CGMCC 3.17722* | Saprobies/<br>pathogens                | Hyaline                      | Septate              | KT343254  | N/A       | [125,126]    |
| <i>B. dothidea</i>            | CGMCC3.18745   | Pathogens                              | Hyaline                      | Septate              | KX278003  | MF410045  | [127]        |
| <i>B. fabicerciana</i>        | CBS 127193*    | Saprobies/<br>pathogens                | Hyaline                      | Aseptate             | HQ332197  | N/A       | [19,128]     |
| <i>B. fabicerciana</i>        | MFLUCC 10-0098 | Pathogens/<br>saprobies/<br>endophytes | Hyaline                      | Aseptate             | JX646789  | JX646806  | [11,129]     |
| <i>B. kuwatsukai</i>          | PG259          | Pathogens                              | Hyaline                      | Septate              | KJ433390  | N/A       | [130]        |
| <i>B. puerensis</i>           | CSF6052        | Pathogens                              | Hyaline                      | Aseptate             | MT028569  | MT029138  | [131]        |
| <i>B. qingyuanensis</i>       | CERC 2946      | Pathogens                              | Hyaline                      | Aseptate             | KX278000  | MF410042  | [132]        |
| <i>B. ramosa</i>              | CBS 122069*    | Saprobies/<br>pathogens                | Hyaline                      | Aseptate             | EU144055  | N/A       | [19,133,134] |
| <i>B. ramosa</i>              | CGMCC3.18739*  | Pathogens                              | Hyaline                      | Aseptate             | KX277989  | MF410031  | [132]        |
| <i>B. scharifii</i>           | CBS 124703*    | Pathogens                              | Hyaline                      | Aseptate             | JQ772020  | N/A       | [19]         |
| <i>Cophinforma atrovirens</i> | MFLUCC 11-0425 | Endophytes/<br>pathogens               | Hyaline                      | Aseptate             | JX646800  | JX646817  | [19,132]     |
| <i>C. atrovirens</i>          | MFLUCC 11-0655 | Saprobies                              | No asexual morph<br>recorded |                      | JX646801  | JX646818  | [11]         |
| <i>C. mamane</i>              | CBS 117444     | Endophytes/<br>pathogens               | Hyaline                      | Aseptate             | KF531822  | DQ377855  | [19,135,136] |
| <i>Diplodia africana</i>      | CBS 120835     | Pathogens                              | Hyaline                      | Aseptate             | EF445343  | MH874653  | [137]        |
| <i>D. agrifolia</i>           | CBS 132777     | Pathogens                              | Hyaline/<br>pigmented        | Aseptate/<br>septate | MH866050  | MH877500  | [19]         |
| <i>D. allocellula</i>         | CMW:36468      | Pathogens/<br>endophytes               | Pigmented                    | Aseptate             | JQ239397  | JQ239410  | [19,138]     |
| <i>D. arengae</i>             | MFLU 17-2769*  | Saprobies                              | No asexual morph<br>recorded |                      | NR_159828 | NG_064503 | [139]        |
| <i>D. bulgarica</i>           | CBS 124254*    | Pathogens                              | Pigmented                    | Septate              | GQ923853  | MH874879  | [102]        |
| <i>D. corticola</i>           | CBS 112549     | Pathogens                              | Pigmented                    | Septate              | AY259100  | AY928051  | [140]        |
| <i>D. crataegicola</i>        | MFLUCC 150905  | Saprobies                              | Pigmented                    | Aseptate             | MF398871  | N/A       | [141]        |
| <i>D. cupressi</i>            | CBS 168.87     | Pathogens                              | Pigmented                    | Septate              | DQ458893  | EU673263  | [19]         |
| <i>D. eriobotryicola</i>      | CBS 140851*    | Pathogens                              | Pigmented                    | Aseptate             | NR_152462 | NG_070047 | [142]        |
| <i>D. estuarina</i>           | CMW 41231*     | Endophytes                             | Pigmented                    | Aseptate             | NR_152461 | N/A       | [143]        |
| <i>D. fraxini</i>             | CBS 136010*    | Pathogens                              | Pigmented                    | Aseptate             | KF307700  | N/A       | [144]        |
| <i>D. galiicola</i>           | JZB 3140014    | Saprobies                              | Pigmented                    | Aseptate             | MN757871  | N/A       | [141]        |
| <i>D. malorum</i>             | CBS 124130     | Pathogens                              | Pigmented                    | Septate              | GQ923865  | MH874878  | [19,145]     |
| <i>D. mutila</i>              | CBS 112553     | Pathogens/<br>saprobies/<br>endophytes | Pigmented                    | Septate              | AY259093  | AY928049  | [19,90,146]  |
| <i>D. neojuniperi</i>         | CPC 22753*     | Pathogens/<br>saprobies                | Pigmented                    | Septate              | NR_152460 | N/A       | [33,106]     |
| <i>D. olivarum</i>            | CBS 121887     | Pathogens                              | Hyaline/<br>Pigmented        | Aseptate/<br>Septate | EU392302  | MH874707  | [19]         |
| <i>D. pseudoseriata</i>       | CBS 124906     | Endophytes/<br>pathogens               | Pigmented                    | Aseptate             | EU080927  | MH874931  | [19,128]     |

|                                  |                |                                        |                       |                        |           |          |              |
|----------------------------------|----------------|----------------------------------------|-----------------------|------------------------|-----------|----------|--------------|
| <i>D. pseudoseriata</i>          | CBS 124931     | Pathogens/<br>endophytes/<br>saprobes  | Pigmented             | Septate                | MH863427  | MH874935 | [19,24,33]   |
| <i>D. quercicola</i>             | CFCC 53769*    | Pathogens                              | Hyaline               | Aseptate               | NR_169975 | MN215866 | [121]        |
| <i>D. quercivora</i>             | BL8            | Pathogens                              | Hyaline/<br>pigmented | Aseptate/<br>septate   | JX894205  | N/A      | [147]        |
| <i>D. rosulata</i>               | CBS 116470     | Pathogens/<br>endophytes               | Pigmented             | Septate                | EU430265  | DQ377896 | [19,148,149] |
| <i>D. sapinea</i>                | CBS 393.84*    | Pathogens/<br>endophytes/<br>saprobes  | Pigmented             | Aseptate               | NR_152452 | DQ377893 | [32,33,146]  |
| <i>D. sapinea</i>                | CBS 124462     | Saprobes/<br>pathogens                 | Pigmented             | Aseptate               | GQ923858  | MH874896 | [149–151]    |
| <i>D. scrobiculata</i>           | CBS 109944*    | Pathogens/<br>endophytes               | Pigmented             | Septate                | DQ458899  | EU673268 | [19,20,152]  |
| <i>D. seriata</i>                | CBS 112555     | Saprobes/<br>/ endophytes<br>pathogens | Pigmented             | Aseptate               | AY259094  | AY928050 | [19,153,154] |
| <i>D. subglobosa</i>             | CBS 124133*    | Pathogens                              | Pigmented             | Septate                | GQ923856  | N/A      | [155,156]    |
| <i>D. torilicola</i>             | IT3612*        | Saprobes                               | Pigmented             | Aseptate               | MK625223  | N/A      | [157]        |
| <i>D. tsugae</i>                 | CBS 418.64     | Pathogens                              | Hyaline               | Aseptate               | DQ458888  | DQ377867 | [19]         |
| <i>Dothiorella<br/>acacicola</i> | CPC 26349      | Saprobes                               | Pigmented             | Septate                | KX228269  | KX228320 | [15]         |
| <i>D. acericola</i>              | KUMCC 18-0137* | Saprobes                               | Pigmented             | Septate                | MK359449  | N/A      | [158]        |
| <i>D. alpina</i>                 | CGMCC 3.18001  | Saprobes/<br>pathogens                 | Pigmented             | Septate                | KX499645  | N/A      | [159,160]    |
| <i>D. alpina</i>                 | KUMCC 18–0135  | Saprobes/<br>pathogens                 | Pigmented             | Septate                | MT002267  | MT002266 | [160,161]    |
| <i>D. americana</i>              | CBS 128309*    | Pathogens                              | Pigmented             | Septate                | HQ288218  | MH876298 | [19]         |
| <i>D. brevicollis</i>            | CBS 130411*    | Endophytes/<br>pathogens               | Pigmented             | Septate                | JQ239403  | JQ239416 | [19,138]     |
| <i>D. capri-amissi</i>           | CBS:121763     | Pathogens                              | Pigmented             | Aseptate/<br>septate   | EU101323  | KX464301 | [111]        |
| <i>D. casuarini</i>              | CBS 120688*    | Pathogens                              | Pigmented             | Septate                | DQ846773  | MH874647 | [19,162]     |
| <i>D. citricola</i>              | ICMP16828      | Pathogens                              | Pigmented             | Septate                | EU673323  | N/A      | [146]        |
| <i>D. dulcispinae</i>            | CMW:36460      | Endophytes                             | Pigmented             | Septate                | JQ239400  | JQ239413 | [19]         |
| <i>D. dulcispinae</i>            | CMW 25407*     | Pathogens/<br>endophytes               | Pigmented             | Aseptate or<br>septate | EU101300  | KF766329 | [111,148]    |
| <i>D. iranica</i>                | IRAN1587C*     | Pathogens/<br>saprobes                 | Pigmented             | Septate                | KC898231  | N/A      | [146,163]    |
| <i>D. lampangensis</i>           | MFLUCC 18-0232 | Saprobes                               | Pigmented             | Septate                | MK347758  | N/A      | [164]        |
| <i>D. longicollis</i>            | CBS 122068     | Endophytes                             | Pigmented             | Septate                | EU144054  | MH874718 | [19]         |
| <i>D. magnoliae</i>              | CFCC 51563     | Pathogens                              | Pigmented             | Septate                | KY111247  | N/A      | [165]        |
| <i>D. mangifericola</i>          | IRAN1584C*     | Pathogens                              | Pigmented             | Septate                | KC898221  | N/A      | [146,165]    |
| <i>D. mangifericola</i>          | CBS 121760*    | Pathogens                              | Pigmented             | Septate                | EU101290  | N/A      | [19]         |
| <i>D. moneti</i>                 | MUCC505        | Endophytes                             | Pigmented             | Septate                | EF591920  | EF591937 | [19]         |
| <i>D. plurivora</i>              | IRAN1557C*     | Pathogens/<br>endophytes               | Pigmented             | Septate                | KC898225  | N/A      | [90,146,151] |
| <i>D. pretoriensis</i>           | CMW:36480      | Pathogens/<br>endophytes               | Pigmented             | Septate                | JQ239405  | JQ239418 | [19,42]      |

|                                                             |                |                                        |           |          |           |           |                    |
|-------------------------------------------------------------|----------------|----------------------------------------|-----------|----------|-----------|-----------|--------------------|
| <i>D. prunicola</i>                                         | CAP187         | Pathogens                              | Pigmented | Septate  | EU673313  | EU673232  | [146]              |
| <i>D. rhamni</i>                                            | MFLUCC 14-0902 | Saprobies/<br>weak<br>pathogen         | Pigmented | Septate  | KU246381  | KU246382  | [122,166]          |
| <i>D. rhamni</i>                                            | CBS 140852*    | Pathogens                              | Pigmented | Aseptate | KT240287  | MH878199  | [142]              |
| <i>D. santali</i>                                           | MUCC 509       | Endophytes                             | Pigmented | Septate  | EF591924  | EF591941  | [19]               |
| <i>D. sarmentorum</i>                                       | IMI 63581b     | Saprobies/<br>pathogens                | Pigmented | Septate  | AY573212  | AY928052  | [19,167]           |
| <i>D. sarmentorum</i><br>(? <i>D. californica</i> )         | CBS 141587*    | Weak<br>pathogens/<br>endophytes       | Pigmented | Septate  | KX357188  | N/A       | [140]              |
| <i>D. sarmentorum</i><br>(? <i>D. sempervirentis</i> )      | IRAN1583C*     | Pathogens/<br>saprobies                | Pigmented | Septate  | KC898236  | N/A       | [122,146]          |
| <i>D. sarmentorum</i><br>(? <i>D. iberica</i> )             | CBS 115041     | Saprobies/<br>pathogens/<br>endophytes | Pigmented | Septate  | AY573202  | AY928053  | [19,90,168]        |
| <i>D. sarmentorum</i><br>(? <i>D. guttulata</i> )           | MFLUCC 17-0242 | Saprobies                              | Pigmented | Septate  | KY797637  | KY815014  | [169]              |
| <i>D. sarmentorum</i>                                       | MFLUCC 17-0951 | Saprobies/<br>Pathogens/<br>endophytes | Pigmented | Septate  | MG828897  | N/A       | [8,89,121,<br>170] |
| <i>D. sarmentorum</i><br>(? <i>D. omnivora</i> )            | CBS:392.80     | Pathogens/<br>saprobies                | Pigmented | Septate  | KX464133  | KX464348  | [122,171]          |
| <i>D. sarmentorum</i><br>(? <i>D. parva</i> )               | IRAN1579C*     | Pathogens/<br>endophytes               | Pigmented | Septate  | KC898234  | N/A       | [146,172]          |
| <i>D. sarmentorum</i><br>(? <i>D. symphoricarposicola</i> ) | MFLUCC 13-0498 | Saprobies/<br>pathogens                | Pigmented | Septate  | KJ742379  | N/A       | [167,168]          |
| <i>D. sarmentorum</i><br>(? <i>D. vidmadera</i> )           | CBS:725.79     | Saprobies/<br>weak<br>pathogens        | Pigmented | Septate  | KX464130  | KX464340  | [163,166]          |
| <i>D. striata</i>                                           | ICMP 16819     | Pathogens                              | Pigmented | Septate  | EU673320  | N/A       | [146]              |
| <i>D. striata</i>                                           | DAR80992       | Pathogens                              | Pigmented | Septate  | KJ573643  | N/A       | [173]              |
| <i>D. tectonae</i>                                          | MFLUCC12-0382* | Saprobies                              | Pigmented | Septate  | KM396899  | N/A       | [174]              |
| <i>D. thailandica</i>                                       | MFLUCC 11-0438 | Saprobies                              | Pigmented | Septate  | NR_111794 | NG_042725 | [19]               |
| <i>D. thripsita</i>                                         | BRIP 51876     | Saprobies                              | Pigmented | Septate  | KJ573642  | N/A       | [19]               |
| <i>D. uruguayensis</i>                                      | CBS 124908     | Endophytes                             | Pigmented | Septate  | EU080923  | MH874932  | [19]               |
| <i>D. vinea-gemmae</i>                                      | B116-3         | Pathogens                              | Pigmented | Septate  | KJ573644  | N/A       | [173]              |
| <i>D. viticola</i>                                          | CBS 117009     | Pathogens/<br>endophytes               | Pigmented | Septate  | AY905554  | DQ377873  | [175,176]          |
| <i>D. viticola</i>                                          | WA10NO01       | Pathogens                              | Pigmented | Septate  | HM009376  | N/A       | [173]              |
| <i>D. yunnana</i>                                           | CGMCC 3.18000  | Saprobies/<br>pathogens                | Pigmented | Septate  | KX499644  | N/A       | [90,159]           |
| <i>Endomelanconiopsis endophytica</i>                       | CBS 120397     | Endophytes/<br>pathogens               | Pigmented | Aseptate | EU683656  | EU683629  | [177,178]          |
| <i>E. microspora</i>                                        | CBS 353.97     | Endophytes                             | Pigmented | Aseptate | EU683655  | EU683628  | [19,179]           |
| <i>Eutiarosporella africana</i>                             | CBS 133854     | Endophytes                             | Hyaline   | Aseptate | KC769956  | KC769990  | [180]              |
| <i>E. dactylidis</i>                                        | MFLUCC 13-0276 | Saprobies                              | Hyaline   | Aseptate | KM978944  | KM978949  | [166,181]          |

|                                 |                 |                                        |           |          |           |          |               |
|---------------------------------|-----------------|----------------------------------------|-----------|----------|-----------|----------|---------------|
| <i>E. darliae</i>               | CBS:118530      | Pathogens                              | Hyaline   | Aseptate | KX464131  | KX464346 | [182]         |
| <i>E. pseudodarliae</i>         | DAR 82489       | Pathogens                              | Hyaline   | Aseptate | KP309796  | N/A      | [182]         |
| <i>E. tritici</i>               | CBS 118719      | Pathogens                              | Hyaline   | Aseptate | KF531830  | DQ377941 | [183]         |
| <i>E. tritici-australis</i>     | DAR 82485       | Pathogens                              | Hyaline   | Aseptate | KP309788  | N/A      | [182]         |
| <i>E. urbis-rosarum</i>         | CMW:36477*      | Endophytes                             | Hyaline   | Aseptate | NR_111705 | JQ239420 | [184]         |
| <i>Lasiodiplodia aquilariae</i> | CGMCC 3.18471   | Endophytes                             | Pigmented | Septate  | KY783442  | N/A      | [185]         |
| <i>L. avicenniae</i>            | CBS 139670*     | Endophytes                             | Pigmented | Septate  | KP860835  | N/A      | [143]         |
| <i>L. avicenniarum</i>          | C376            | Saprobies                              | Pigmented | Septate  | MK347777  | MK347994 | [164]         |
| <i>L. brasiliensis</i>          | CERC 2284       | Pathogens                              | Pigmented | Septate  | KX278010  | MF410054 | [164,186]     |
| <i>L. bruguierae</i>            | CMW42480        | Endophytes                             | Pigmented | Septate  | KP860832  | N/A      | [143]         |
| <i>L. chonburiensis</i>         | MFLUCC 16-0376* | Saprobies                              | Hyaline   | Aseptate | MH275066  | MH260299 | [119]         |
| <i>L. cinnamomi</i>             | CFCC 51997*     | Pathogens                              | Hyaline   | Aseptate | MG866028  | N/A      | [187]         |
| <i>L. citricola</i>             | CBS 124707      | Endophytes/<br>Pathogens               | Pigmented | Septate  | GU945354  | N/A      | [19,188]      |
| <i>L. crassispora</i>           | CBS 118741      | Pathogens/<br>endophytes               | Pigmented | Septate  | DQ103550  | DQ377901 | [19,176]      |
| <i>L. crassispora</i>           | CBS 121770*     | Pathogens                              | Pigmented | Aseptate | EU101307  | N/A      | [111]         |
| <i>L. euphorbicola</i>          | CMM3609         | Pathogens/<br>endophytes               | Pigmented | Septate  | KF234543  | N/A      | [189,190]     |
| <i>L. gilanensis</i>            | CBS 124704      | Endophytes/<br>pathogens               | Pigmented | Septate  | GU945351  | N/A      | [19,191]      |
| <i>L. gilanensis</i>            | CBS 128311      | Pathogens                              | Pigmented | Septate  | HQ288225  | N/A      | [19,192]      |
| <i>L. gonubiensis</i>           | CBS 115812      | Endophytes/<br>Pathogens               | Pigmented | Septate  | AY639595  | DQ377902 | [19,193,194]  |
| <i>L. gravistriata</i>          | CMM4564*        | Pathogens                              | Pigmented | Septate  | KT250949  | N/A      | [195]         |
| <i>L. hormozganensis</i>        | CBS:177.89      | Endophytes/<br>pathogens/<br>saprobies | Pigmented | Septate  | KX464134  | KX464349 | [19,94,196]   |
| <i>L. iraniensis</i>            | CBS 124710      | Endophytes/<br>pathogens/<br>saprobies | Pigmented | Septate  | GU945346  | MH874918 | [19,94,197]   |
| <i>L. krabiensis</i>            | MFLU 17-2617    | Saprobies                              | Hyaline   | Aseptate | MN047093  | MN017859 | [198]         |
| <i>L. laeliocattleyae</i>       | CBS 167.28      | Endophytes/<br>pathogens               | Pigmented | Septate  | KU507487  | DQ377892 | [199]         |
| <i>L. lignicola</i>             | CBS 134112*     | Saprobies                              | Pigmented | Septate  | JX646797  | N/A      | [19]          |
| <i>L. lignicola</i>             | CBS 342.78*     | Pathogens/<br>saprobies                | Hyaline   | Aseptate | KX464140  | N/A      | [6,8]         |
| <i>L. lignicola</i>             | CGMCC 3.18061*  | Saprobies/<br>pathogens                | Pigmented | Septate  | KX499889  | N/A      | [200]         |
| <i>L. macrospora</i>            | CMM3833         | Pathogens                              | Pigmented | Septate  | KF234557  | N/A      | [189]         |
| <i>L. mahajangana</i>           | CBS:559.70      | Endophytes/<br>Pathogens               | Pigmented | Septate  | KX464137  | KX464353 | [19,151]      |
| <i>L. mahajangana</i>           | IBL352          | Pathogens                              | Pigmented | Septate  | KT154759  | N/A      | [201]         |
| <i>L. mahajangana</i>           | CBS 137785*     | Pathogens/<br>endophytes               | Pigmented | Septate  | KJ638317  | N/A      | [176,202,203] |
| <i>L. margaritacea</i>          | CBS 122519      | Endophytes/<br>Pathogens               | Pigmented | Septate  | KT852959  | KX464354 | [19,204]      |
| <i>L. mediterranea</i>          | BL187           | Pathogens                              | Pigmented | Septate  | KJ638321  | N/A      | [202]         |
| <i>L. microconidia</i>          | CGMCC 3.18485   | Endophytes/                            | Pigmented | Septate  | KY783441  | N/A      | [45,160]      |

|                                    |                 |                                |                           |          |           |           |                 |
|------------------------------------|-----------------|--------------------------------|---------------------------|----------|-----------|-----------|-----------------|
|                                    |                 | pathogens                      |                           |          |           |           |                 |
| <i>L. pandanicola</i>              | MFLUCC 16-0265* | Saprobies                      | Pigmented                 | Septate  | MH275068  | MH260301  | [119]           |
| <i>L. parva</i>                    | CBS 494.78      | Pathogens/endophytes           | Pigmented                 | Septate  | EF622084  | EU673258  | [19,42,192]     |
| <i>L. plurivora</i>                | CBS 120832      | Pathogens                      | Pigmented                 | Septate  | EF445362  | N/A       | [137]           |
| <i>L. pontae</i>                   | IBL12           | Pathogens                      | Pigmented                 | Septate  | KT151794  | N/A       | [201]           |
| <i>L. pseudotheobromae</i>         | CBS 116459      | Saprobies/pathogens/endophytes | Pigmented                 | Septate  | EF622077  | N/A       | [94,119,164]    |
| <i>L. rubropurpurea</i>            | CBS 118740*     | Pathogens/endophytes           | Pigmented                 | Septate  | DQ103553  | DQ377903  | [19,42]         |
| <i>L. subglobosa</i>               | CMM3872         | Pathogens                      | Pigmented                 | Septate  | KF234558  | N/A       | [189]           |
| <i>L. syzygii</i>                  | GUCC 9719.2     | Pathogens/saprobies            | Pigmented                 | Septate  | MW081991  | MW081988  | [8,205]         |
| <i>L. thailandica</i>              | CPC 22795       | Endophytes/pathogens/saprobies | Pigmented                 | Aseptate | KJ193637  | N/A       | [94,200,206]    |
| <i>L. thailandica</i>              | MFLUCC 18-0244* | Saprobies                      | Pigmented                 | Septate  | MK347789  | NG_066319 | [164]           |
| <i>L. theobromae</i>               | CBS 164.96      | Saprobies/pathogens/endophytes | Pigmented                 | Septate  | AY640255  | EU673253  | [11,19,164,207] |
| <i>L. tropica</i>                  | CGMCC 3.18477   | Endophytes                     | Pigmented                 | Septate  | KY783454  | N/A       | [185]           |
| <i>L. venezuelensis</i>            | CBS 118739*     | Endophytes                     | Pigmented                 | Septate  | DQ103547  | DQ377904  | [19]            |
| <i>L. viticola</i>                 | CBS 128313      | Pathogens/endophytes           | Pigmented                 | Septate  | HQ288227  | NG_058231 | [19,192,208]    |
| <i>L. vitis</i>                    | CBS 124060*     | Pathogens                      | Pigmented                 | Septate  | KX464148  | KX464367  | [6]             |
| <i>Macrophomina euphorbiicola</i>  | CMM 4045        | Pathogens                      | No morphology observed    |          | KU058928  | N/A       | [209]           |
| <i>M. phaseolina</i>               | CBS 227.33      | Endophytes/pathogens           | Pigmented                 | Aseptate | KF951627  | DQ377906  | [26,210]        |
| <i>M. pseudophaseolina</i>         | CPC 21417       | Pathogens                      | Pigmented                 | Aseptate | KF951791  | N/A       | [210]           |
| <i>M. vaccinii</i>                 | CGMCC 3.19503   | Pathogens                      | Hyaline                   | Aseptate | MK687450  | N/A       | [211]           |
| <i>Marasasiomyces karoo</i>        | CBS 118718      | Saprobies                      | Hyaline                   | Aseptate | KF531828  | DQ377939  | [134,183]       |
| <i>Mucoharknessia anthoxanthii</i> | MFLUCC 15-0904  | Saprobies                      | Hyaline                   | Aseptate | NR_148092 | KU246379  | [166]           |
| <i>M. cortaderiae</i>              | CPC 19974       | Saprobies                      | Pigmented                 | Aseptate | KM108374  | KM108401  | [183]           |
| <i>Neodeightonia licuriensis</i>   | COAD1780        | Pathogens                      | Pigmented                 | Septate  | KP165429  | N/A       | [212]           |
| <i>N. microspora</i>               | MFLUCC 11-0483* | Saprobies                      | No asexual morph recorded |          | KU940110  | NG_059668 | [213]           |
| <i>N. palmicola</i>                | MFLUCC 10-0822  | Saprobies/endophytes/pathogens | Pigmented                 | Septate  | HQ199221  | HQ199222  | [11,214]        |
| <i>N. phoenicum</i>                | CBS 122528      | Saprobies/pathogens            | Pigmented                 | Septate  | EU673340  | EU673261  | [49,215,216]    |
| <i>N. planchoniae</i>              | MFLUCC 17-2427* | Saprobies                      | No asexual morph recorded |          | NR_163335 | MK347972  | [164]           |

|                                 |                |                                        |                              |                      |           |           |               |
|---------------------------------|----------------|----------------------------------------|------------------------------|----------------------|-----------|-----------|---------------|
| <i>N. rattanica</i>             | MFLUCC 15-0313 | Saprobies                              | Pigmented                    | Aseptate             | KX646358  | KX646353  | [116]         |
| <i>N. rattanicola</i>           | MFLUCC 15-0319 | Saprobies                              | Pigmented                    | Aseptate             | KX646359  | KX646354  | [116]         |
| <i>N. subglobosa</i>            | CBS 448.91     | Saprobies/<br>pathogens/<br>endophytes | Pigmented                    | Septate              | EU673337  | DQ377866  | [11,160,217]  |
| <i>Neofusicoccum<br/>arbuti</i> | CBS 117453*    | Pathogens                              | Hyaline                      | Aseptate/<br>septate | AY693976  | DQ377914  | [19]          |
| <i>N. arbuti</i>                | CBS 116131*    | Pathogens/<br>endophytes               | Pigmented                    | Septate              | AY819720  | DQ377915  | [19,218,219]  |
| <i>N. australe</i>              | CMW 6837       | Pathogens/<br>endophytes               | Hyaline                      | Aseptate             | AY339262  | KF766367  | [19,193,219]  |
| <i>N. brasiliense</i>           | CMM1338        | Pathogens                              | Hyaline                      | Aseptate             | JX513630  | N/A       | [220]         |
| <i>N. buxi</i>                  | CBS 116.75*    | Pathogens                              | Hyaline                      | Aseptate             | NR_147366 | NG_058256 | [6]           |
| <i>N. cordaticola</i>           | CBS 123634*    | Endophytes                             | Hyaline                      | Aseptate             | EU821898  | MH874849  | [19]          |
| <i>N. cryptoaustrale</i>        | CMW 23785*     | Endophytes/<br>pathogens               | Pigmented                    | Septate              | FJ752742  | N/A       | [110,221]     |
| <i>N. dianense</i>              | CSF6075        | Pathogens                              | Hyaline                      | Aseptate             | MT028605  | MT029159  | [131]         |
| <i>N. eucalypticola</i>         | CBS 115679*    | Pathogens/<br>endophytes               | Hyaline                      | Aseptate             | AY615141  | KF766368  | [19,42,222]   |
| <i>N. eucalyptorum</i>          | CBS 115791     | Pathogens/<br>endophytes               | Hyaline                      | Aseptate             | AF283686  | N/A       | [19,24,222]   |
| <i>N. grevilleae</i>            | CBS 129518     | Pathogens/<br>endophytes               | Hyaline                      | Aseptate             | JF951137  | N/A       | [19,223,224]  |
| <i>N. hellenicum</i>            | CERC1947       | Pathogens                              | Hyaline                      | Aseptate             | KP217053  | N/A       | [225]         |
| <i>N. hongkongensis</i>         | CERC 2973*     | Pathogens                              | Hyaline                      | Aseptate             | KX278052  | MF410096  | [132]         |
| <i>N. ilicii</i>                | CGMCC 3.18311* | Endophytes                             | Pigmented                    | Septate              | KY350150  | N/A       | [226]         |
| <i>N.<br/>kwambonambiense</i>   | CBS 123639     | Pathogens/<br>endophytes               | Hyaline                      | Aseptate             | EU821900  | MH874850  | [19,227]      |
| <i>N. lumnitzeriae</i>          | CMW41469       | Endophytes                             | Hyaline                      | Aseptate             | KP860881  | N/A       | [143]         |
| <i>N. luteum</i>                | CBS 562.92     | Pathogens/<br>endophytes               | Hyaline                      | Aseptate             | KX464170  | N/A       | [19,193]      |
| <i>N. luteum</i>                | CMW 41365*     | Endophytes                             | Hyaline                      | Aseptate             | KP860859  | N/A       | [143]         |
| <i>N. macroclavatum</i>         | CBS 118223*    | Endophytes                             | Hyaline                      | Aseptate             | DQ093196  | KX464436  | [19]          |
| <i>N. magniconidium</i>         | CSF5876*       | Pathogens                              | Hyaline                      | Aseptate             | MT028612  | MT029166  | [131]         |
| <i>N. mangiferae</i>            | CMW7024        | Pathogens/<br>endophytes               | Hyaline                      | Aseptate             | AY615185  | N/A       | [193,226,228] |
| <i>N. mediterraneum</i>         | CBS 121718*    | Pathogens                              | Hyaline                      | Aseptate             | GU251176  | MH874696  | [19,229]      |
| <i>N. mediterraneum</i>         | CBS 113083*    | Pathogens                              | Hyaline                      | Aseptate             | KX464186  | KX464465  | [6]           |
| <i>N. mediterraneum</i>         | CBS 113089*    | Pathogens                              | Hyaline                      | Aseptate             | KX464199  | KX464481  | [230]         |
| <i>N. microconidium</i>         | CERC 3497*     | Pathogens                              | Hyaline                      | Aseptate             | KX278053  | MF410097  | [132]         |
| <i>N. ningerense</i>            | CSF6028*       | Pathogens                              | No asexual morph<br>recorded |                      | MT028613  | MT029167  | [131]         |
| <i>N. nonquaesitum</i>          | CBS 126655     | Pathogens                              | Hyaline                      | Septate              | MH864187  | MH875645  | [19]          |
| <i>N. oculatum</i>              | CBS 128008*    | Endophytes/<br>Pathogens               | Pigmented                    | Septate              | EU301030  | MH876179  | [19,231]      |
| <i>N. parviconidium</i>         | CSF5667*       | Pathogens                              | Hyaline                      | Aseptate             | MT028615  | MT029169  | [131]         |
| <i>N. parvum</i>                | CBS 138823*    | Endophytes/<br>pathogens/<br>saprobies | Hyaline                      | Aseptate             | AY236943  | N/A       | [164,219]     |
| <i>N. parvum</i>                | CBS 137504*    | Pathogens                              | Hyaline                      | Aseptate             | KJ657702  | N/A       | [232]         |

|                                     |                 |                                |                           |                  |           |           |                   |
|-------------------------------------|-----------------|--------------------------------|---------------------------|------------------|-----------|-----------|-------------------|
| <i>N. parvum</i>                    | MFLUCC 15-0900* | Saprobies                      | Pigmented                 | Septate          | KY856755  | N/A       | [230]             |
| <i>N. pennatisporum</i>             | MUCC 510        | Endophytes                     | Hyaline                   | Aseptate/septate | EF591925  | NG_060253 | [19]              |
| <i>N. pistaciae</i>                 | CBS 595.76*     | Pathogens                      | Hyaline                   | Aseptate         | KX464163  | MH872782  | [6]               |
| <i>N. protearum</i>                 | CBS 114176*     | Pathogens/endophytes           | Hyaline                   | Aseptate         | AF452539  | N/A       | [19,30,227]       |
| <i>N. ribis</i>                     | CBS 115475      | Pathogens/endophytes           | Hyaline                   | Aseptate         | AY236935  | N/A       | [19,193,233]      |
| <i>N. ribis</i>                     | CBS 124924      | Endophytes/pathogens           | Hyaline                   | Aseptate         | FJ900607  | KX464401  | [19,128]          |
| <i>N. ribis</i>                     | CBS 123645*     | Endophytes/pathogens           | Hyaline                   | Aseptate         | EU821904  | N/A       | [19,128]          |
| <i>N. sinense</i>                   | CGMCC 3.18315*  | Saprobies                      | Hyaline                   | Septate          | KY350148  | N/A       | [226]             |
| <i>N. sinoeucalypti</i>             | CERC 2005*      | Pathogens                      | Hyaline                   | Aseptate         | KX278061  | MF410105  | [132]             |
| <i>N. stellenboschiana</i>          | CBS 110864*     | Pathogens/endophytes           | Hyaline                   | Septate          | AY343407  | NG_058259 | [6,8,230]         |
| <i>N. terminaliae</i>               | CBS 125264      | Endophytes/pathogens           | Hyaline                   | Aseptate/septate | GQ471802  | KX464519  | [234]             |
| <i>N. ursorum</i>                   | CMW 24480*      | Endophytes/pathogens/saprobies | Hyaline                   | Aseptate         | FJ752746  | N/A       | [8,110]           |
| <i>N. viticlavatum</i>              | CBS 112878*     | Pathogens/endophytes           | Hyaline                   | Aseptate         | AY343381  | MH874474  | [19,227,230]      |
| <i>N. vitifusiforme</i>             | CBS 110887      | Pathogens/endophytes           | Hyaline                   | Aseptate         | AY343383  | MH874455  | [19,138,226]      |
| <i>N. vitifusiforme</i>             | CBS 120081*     | Pathogens                      | Pigmented                 | Septate          | DQ923533  | MN162190  | [235]             |
| <i>N. yunnanense</i>                | CSF6142*        | Pathogens                      | Hyaline                   | Aseptate         | MT028667  | MT029193  | [131]             |
| <i>Neoscytalidium dimidiatum</i>    | CBS 499.66      | Pathogens                      | Hyaline/pigmented         | Aseptate/septate | KF531820  | DQ377925  | [236]             |
| <i>N. dimidiatum</i>                | CBS 122071      | Pathogens/endophytes           | Pigmented                 | Septate          | EF585540  | KF766374  | [18,96, 149, 237] |
| <i>N. dimidiatum</i>                | MFLUCC 12-0533  | Saprobies/pathogens            | Hyaline                   | Septate          | KU179865  | KU179864  | [238,239]         |
| <i>Oblongocollomyces variabilis</i> | CBS 121774      | Saprobies/endophytes           | Pigmented                 | Septate          | NR136994  | KX464536  | [6,138]           |
| <i>Phaeobotryon aplosporum</i>      | CFCC 53774      | Pathogens                      | Pigmented                 | Aseptate         | MN215836  | MN215871  | [121]             |
| <i>P. cupressi</i>                  | CBS 124700      | Pathogens/endophytes           | Hyaline                   | Aseptate         | FJ919672  | KX464538  | [19,117,239]      |
| <i>P. mamane</i>                    | CPC 12440       | Saprobies                      | Pigmented                 | Septate          | EU673332  | EU673248  | [19,49]           |
| <i>P. negundinis</i>                | MFLUCC 15-0436  | Pathogens/saprobies            | Pigmented                 | Aseptate         | KU820970  | KU820971  | [8,240]           |
| <i>P. rhoinum</i>                   | CFCC 52450*     | Pathogens                      | Pigmented                 | Septate          | MH133924  | MH133941  | [105]             |
| <i>P. rhois</i>                     | CFCC 89662      | Saprobies/pathogens            | No asexual morph recorded |                  | KM030584  | KM030591  | [19,105]          |
| <i>P. ulmi</i>                      | CBS 123.30      | Saprobies                      | Pigmented                 | Septate          | KX464232  | DQ377861  | [8]               |
| <i>Sakireeta madreeya</i>           | CBS 532.76      | Saprobies                      | Hyaline                   | Aseptate         | KC769960  | DQ377940  | [183]             |
| <i>Sardiniella urbana</i>           | CBS 141580      | Pathogens                      | Pigmented                 | Septate          | NR_155806 | NG_060007 | [221]             |
| <i>Sphaeropsis chromolaenicola</i>  | MFLUCC 17-1499* | Saprobies                      | No asexual morph recorded |                  | NR_168871 | MT214460  | [107]             |



|                                    |                 |                                        |                           |          |           |           |               |
|------------------------------------|-----------------|----------------------------------------|---------------------------|----------|-----------|-----------|---------------|
| <i>S. citrigena</i>                | ICMP 16812      | Saprobies                              | Pigmented                 | Aseptate | EU673328  | EU673246  | [19]          |
| <i>S. eucalypticola</i>            | CBS 133993      | Saprobies                              | No asexual morph recorded |          | JX646802  | JX646819  | [19]          |
| <i>S. porosa</i>                   | STE-U 5132      | Pathogens                              | Pigmented                 | Septate  | AY343379  | DQ377894  | [19,241]      |
| <i>S. visci</i>                    | CBS 100163      | Pathogens/<br>saprobies                | Pigmented                 | Aseptate | EU673324  | EU754215  | [19,183,242]  |
| <i>Tiarospora corymbiae</i>        | CBS 142532      | Saprobies                              | Hyaline                   | Aseptate | KY979769  | KY979824  | [243]         |
| <i>T. paludosa</i>                 | CPC 22701*      | Pathogens or<br>endophytes             | Hyaline                   | Aseptate | NR_132907 | KM108404  | [183]         |
| <b>Melanopsaceae</b>               |                 |                                        |                           |          |           |           |               |
| <i>Melanops castaneicola</i>       | CFCC 52980*     | Pathogens/<br>saprobies                | Hyaline                   | Aseptate | MK203065  | MK203069  | [187]         |
| <i>M. chinensis</i>                | CFCC 52982*     | Pathogens/<br>saprobies                | Hyaline                   | Aseptate | MK203067  | MK203071  | [187]         |
| <i>M. tulasnei</i>                 | CBS 118.39      | Pathogens                              | Hyaline                   | Aseptate | FJ824771  | DQ377856  | [4]           |
| <i>M. tulasnei</i>                 | CBS 116805      | Saprobies                              | Hyaline                   | Aseptate | FJ824769  | KF766365  | [50]          |
| <b>Phyllostictaceae</b>            |                 |                                        |                           |          |           |           |               |
| <i>Phyllosticta acaciigena</i>     | CPC 28295       | Saprobies                              | Hyaline                   | Aseptate | KY173433  | KY173523  | [15,40]       |
| <i>P. bifrenariae</i>              | CBS 128855*     | Pathogens                              | Hyaline                   | Aseptate | NR_137770 | NG_057993 | [39]          |
| <i>P. brazilianiae</i>             | LGMF 330*       | Endophytes                             | Hyaline                   | Aseptate | JF343572  | KF206217  | [39]          |
| <i>P. capitalensis</i>             | CBS 128856*     | Endophytes/<br>pathogens               | Hyaline                   | Aseptate | JF261465  | KF206304  | [39,41]       |
| <i>P. carissicola</i>              | CPC 25665       | Endophytes/<br>pathogens/<br>saprobies | Hyaline                   | Aseptate | KT950849  | KT950863  | [115]         |
| <i>P. minima</i>                   | CBS 111635      | Pathogens                              | Hyaline                   | Aseptate | KF766215  | EU754194  | [3]           |
| <i>P. parthenocissi</i>            | CBS 111645      | Pathogens                              | Hyaline                   | Aseptate | EU683672  | DQ377876  | [96]          |
| <i>P. philoprina</i>               | CBS 616.72      | Endophytes                             | Pigmented                 | Aseptate | KF154279  | KF766341  | [3]           |
| <i>P. podocarp</i>                 | CBS 111647      | Endophytes/<br>saprobies               | Hyaline                   | Aseptate | KF766217  | KF766383  | [3,42]        |
| <i>P. rhizophorae</i>              | NCYUCC 19-0352* | Endophytes                             | Hyaline                   | Aseptate | MT360030  | MT360039  | [244]         |
| <i>Pseudofusicoccum adansoniae</i> | CBS 122055      | Saprobies/<br>endophytes/<br>pathogens | Hyaline                   | Aseptate | EF585523  | MH874715  | [119,245,246] |
| <i>P. adansoniae</i>               | CMW 26147       | Endophytes/<br>saprobies               | Hyaline                   | Aseptate | KF766220  | KF766386  | [119,245]     |
| <i>P. ardesiacum</i>               | CBS 122062      | Endophytes/<br>Pathogens               | Hyaline                   | Septate  | EU144060  | MH874717  | [97]          |
| <i>P. artocarp</i>                 | B0431           | Endophytes                             | Pigmented                 | Septate  | KM006452  | N/A       | [106]         |
| <i>P. calophylli</i>               | MFLUCC 17-2533* | Saprobies                              | Hyaline                   | Aseptate | NR_163339 | N/A       | [164]         |
| <i>P. kimberleyenses</i>           | CMW 26156       | Endophytes                             | Hyaline                   | Septate  | EU144057  | KF766388  | [19]          |
| <i>P. olivaceum</i>                | CMW22637        | Endophytes/<br>pathogens               | Hyaline                   | Aseptate | FJ888462  | N/A       | [19,128]      |

|                                     |             |                                       |                              |                      |           |           |                    |
|-------------------------------------|-------------|---------------------------------------|------------------------------|----------------------|-----------|-----------|--------------------|
| <i>P. stromaticum</i>               | CBS 117448  | Endophyte/<br>pathogens/<br>saprobes  | Hyaline                      | Aseptate             | AY693974  | DQ377931  | [19]               |
| <i>P. violaceum</i>                 | CMW22681    | Endophytes/<br>pathogens              | Hyaline                      | Aseptate             | FJ888475  | N/A       | [19,247]           |
| <b>Planistromellaceae</b>           |             |                                       |                              |                      |           |           |                    |
| <i>Kellermania anomala</i>          | CBS 132218  | Saprobes/<br>pathogens                | Hyaline                      | Septate              | KF766181  | KF766351  | [2,248]            |
| <i>K. confusa</i>                   | CBS 131723  | Saprobes                              | Hyaline                      | Septate              | KF766174  | KF766344  | [2]                |
| <i>K. crassispora</i>               | CBS 131714  | Saprobes                              | No asexual morph<br>recorded |                      | KF766175  | KF766345  | [2]                |
| <i>K. dasylirionicola</i>           | CBS 131720* | Saprobes                              | Hyaline                      | Aseptate             | NR_165954 | NG_042703 | [2]                |
| <i>K. dasylirionis</i>              | CBS 131715  | Saprobes                              | Hyaline                      | Septate              | KF766177  | KF766347  | [2]                |
| <i>K. macrospora</i>                | CBS 131716  | Saprobes                              | Hyaline                      | Septate              | KF766178  | KF766348  | [2]                |
| <i>K. micranthae</i>                | CBS 131724  | Saprobes                              | Hyaline                      | Aseptate             | NR_120197 | NG042706  | [2]                |
| <i>K. nolinae</i>                   | CBS 131717  | Saprobes                              | Hyaline                      | Septate              | KF766180  | KF766350  | [2]                |
| <i>K. nolinifoliorum</i>            | CBS 131718  | Saprobes                              | Hyaline                      | Septate              | JX444861  | JX444877  | [2]                |
| <i>K. plurilocularis</i>            | CBS 131719  | Saprobes                              | Hyaline                      | Aseptate             | KF766181  | KF766351  | [2]                |
| <i>K. ramaleyae</i>                 | CBS 131722* | Saprobes                              | Hyaline                      | Septate              | NR_120201 | NG_042710 | [2]                |
| <i>K. rostratae</i>                 | CBS 131721* | Saprobes                              | Hyaline                      | Aseptate             | NR_120202 | NG_042711 | [2]                |
| <i>K. uniseptata</i>                | CBS 131725  | Saprobes                              | Hyaline                      | Septate              | KF766184  | KF766354  | [2]                |
| <i>K. yuccifoliorum</i>             | CBS 131726  | Saprobes/<br>pathogens                | Hyaline                      | Septate              | KF766185  | KF766355  | [2,249]            |
| <i>K. yuccigena</i>                 | CBS 131727  | Saprobes/<br>endophytes               | Hyaline                      | Septate              | KF766186  | KF766356  | [2,250]            |
| <i>Umthunziomyces hagahagensis</i>  | CPC 29917   | Saprobes                              | Hyaline                      | Aseptate             | KY173472  | KY173561  | [2]                |
| <b>Saccharataceae</b>               |             |                                       |                              |                      |           |           |                    |
| <i>Pileospora piceae</i>            | NB-334-4A   | Endophytes                            | Hyaline                      | Aseptate             | MH144181  | MH144184  | [251]              |
| <i>Saccharata acaciae</i>           | CBS:143167* | Pathogens                             | Hyaline                      | Aseptate             | NR_156651 | NG_058503 | [252]              |
| <i>S. banksiae</i>                  | CPC 27698   | Saprobes                              | Hyaline                      | Aseptate             | KY173449  | KY173539  | [15]               |
| <i>S. capensis</i>                  | CBS:122693* | Saprobes                              | Hyaline                      | Aseptate             | NR_121347 | MH874758  | [30]               |
| <i>S. daviesiae</i>                 | CPC 29174   | Saprobes                              | Hyaline                      | Septate              | KY173450  | KY173540  | [15]               |
| <i>S. eucalypti</i>                 | CBS 140665  | Saprobes                              | Hyaline                      | Septate              | KT950857  | KT950871  | [15]               |
| <i>S. eucalyptorum</i>              | CPC 29222   | Pathogens                             | Hyaline                      | Aseptate             | KY173451  | KY173541  | [15]               |
| <i>S. hakeae</i>                    | CPC 29204   | Pathogens                             | Hyaline                      | Aseptate             | KY173452  | KY173542  | [15]               |
| <i>S. intermedia</i>                | CBS 125546* | Endophytes                            | Hyaline                      | Aseptate             | NR_156539 | NG_057856 | [253]              |
| <i>S. kirstenboschensis</i>         | CBS 123537  | Endophytes                            | Hyaline                      | Aseptate             | KF766225  | FJ372409  | [14]               |
| <i>S. lambertiae</i>                | CPC 29216   | Saprobes                              | Hyaline                      | Aseptate/<br>septate | KY173459  | KY173549  | [15]               |
| <i>S. leucospermi</i>               | CBS:122694* | Saprobes                              | Hyaline                      | Aseptate             | NR_168142 | N/A       | [230]              |
| <i>S. petrophiles</i>               | CPC 29151   | Endophytes                            | Hyaline                      | Aseptate             | KY173463  | KY173553  | [15]               |
| <i>S. proteae</i>                   | CBS 115206  | Saprobes/<br>endophytes/<br>pathogens | Hyaline                      | Aseptate             | KF766226  | DQ377882  | [11,14,29,<br>230] |
| <i>Septorioides pini-thunbergii</i> | CBS 473.91  | Endophytes/<br>pathogens              | Hyaline                      | Aseptate             | KF251243  | KF251746  | [5,254]            |
| <i>S. strobii</i>                   | CBS141443   | Pathogens                             | Hyaline                      | Aseptate/<br>septate | KT884699  | KT884685  | [5]                |
| <i>S. strobii</i>                   | CBS141444   | Pathogens                             | Hyaline                      | Aseptate/<br>septate | KT884700  | KT884686  | [5]                |

|                              |                |                                        |                           |                      |           |           |           |
|------------------------------|----------------|----------------------------------------|---------------------------|----------------------|-----------|-----------|-----------|
| Acrospermales                |                |                                        |                           |                      |           |           |           |
| Acrospermum longisporium     | MFLU 17-2849   | Saprobies                              | No asexual morph recorded |                      | N/A       | MG815827  | [139]     |
| Asterinales                  |                |                                        |                           |                      |           |           |           |
| Morenoina palmicola          | MFLUCC 15-0284 | Saprobies                              | No asexual morph recorded |                      | MK120273  | MK120272  | [255]     |
| Cladosporiales               |                |                                        |                           |                      |           |           |           |
| Cladosporium cladosporioides | CBS 127286     | Endophytes                             | Pigmented                 | Aseptate             | MH864505  | MH875942  | [256]     |
| C. endophyticum              | MFLU 18-0005   | Endophytes                             | Hyaline                   | Aseptate             | MG646956  | MG646949  | [257]     |
| Toxicocladosporium cacti     | CBS 141539     | Endophytes                             | Pigmented                 | Aseptate             | NR_152376 | NG_069452 | [258]     |
| T. immaculatum               | CBS 141540     | Endophytes                             | Hyaline                   | Aseptate             | NG_058459 | NR_152377 | [258]     |
| Dothideales                  |                |                                        |                           |                      |           |           |           |
| Aureobasidium microstictum   | CBS 342. 66    | Endophytes/<br>pathogens               | Hyaline                   | Aseptate             | FJ150903  | FJ150945  | [259]     |
| A. proteae                   | CPC 2824       | Endophytes/<br>pathogens               | Hyaline                   | Aseptate             | JN712491  | JN712557  | [224]     |
| A. pullulans                 | CBS 109810     | Endophytes                             | Hyaline                   | Aseptate             | FJ150901  | FJ150953  | [181]     |
| A. pullulans                 | MFLUCC 14-0288 | Endophytes/<br>saprobies/<br>pathogens | Hyaline                   | Aseptate             | KM388542  | KM461701  | [181,260] |
| Diaporthe arengae            | CBS 114979     | Endophytes                             | Hyaline                   | Aseptate             | NR_111843 | N/A       | [261]     |
| D. pandanicola               | MFLUCC 17-0607 | Endophytes                             | No asexual morph recorded |                      | NR_172400 | N/A       | [257]     |
| Kabatiella bupleuri          | CBS 131304     | Endophytes/<br>saprobies               | Hyaline/<br>pigmented     | Aseptate/se<br>ptate | KT693738  | N/A       | [262]     |
| Sydowia polyspora            | CBS 116. 29    | Endophytes/<br>pathogens               | Hyaline                   | Aseptate             | MH855019  | MH866487  | [42,263]  |
| Dyfolomycetales              |                |                                        |                           |                      |           |           |           |
| Dyfolomyces tiomanensis      | MFLUCC13-0440  | Saprobies                              | No asexual morph recorded |                      | MK028714  | MK026760  | [264]     |
| Melomastia fusispora         | HKAS 121316    | Saprobies                              | No asexual morph recorded |                      | OK623480  | OK623464  | [265]     |
| Hysteriales                  |                |                                        |                           |                      |           |           |           |
| Hysterium angustatum         | MFLUCC 11-0004 | Saprobies                              | Hyaline                   | Aseptate             | MN608547  | MN577416  | [266]     |
| Jahnulales                   |                |                                        |                           |                      |           |           |           |
| Manglicola guatemalensis     | BCC20156       | Saprobies                              | No asexual morph recorded |                      | JN819283  | FJ743448  | [267]     |
| Kirschsteiniotheliales       |                |                                        |                           |                      |           |           |           |
| Taeniolella exilis           | CBS122902      | Endophytes                             | Pigmented                 | Aseptate/<br>septate | MW883451  | KX244968  | [268]     |
| Magnaporthales               |                |                                        |                           |                      |           |           |           |
| Mycoleptodiscus atromaculans | MUCL 34983     | Endophytes                             | Hyaline                   | Aseptate             | MK487736  | MK487709  | [42,269]  |
| Minutisphaerales             |                |                                        |                           |                      |           |           |           |
| Minutisphaera aquaticum      | MFLU 19-2846   | Saprobies                              | No asexual morph recorded |                      | MN857185  | MN857176  | [270]     |
| M. fimbriatispora            | G155-1         | Saprobies                              | No asexual morph recorded |                      | JX474873  | JX474859  | [271]     |

| Muyocoprionales                |                |                                  |                           |                   |           |           |           |
|--------------------------------|----------------|----------------------------------|---------------------------|-------------------|-----------|-----------|-----------|
| Muyocopron dipterocarpi        | MFLU 15-1132   | Saprobies                        | No asexual morph recorded |                   | MT137785  | KU726966  | [272]     |
| Mycosphaerellales              |                |                                  |                           |                   |           |           |           |
| Acidomyces acidophilus         | CBS 125382     | Endophytes                       | No asexual morph recorded |                   | MH863600  | MH875076  | [273]     |
| Cercospora beticola            | CFSCD 6        | Endophytes/ pathogens            | Hyaline                   | Aseptate          | MZ398294  | N/A       | [110,274] |
| Zasmidium scaevolicola         | CBS 127009     | Endophytes/ pathogens            | Pigmented                 | Septate           | NR_156565 | KF251789  | [275]     |
| Pleosporales                   |                |                                  |                           |                   |           |           |           |
| Acrocalymma vagum              | BRPCR16        | Endophytes                       | Pigmented                 | Septate           | MT658022  | OL687556  | [276]     |
| Alternaria alternata           | SF-001         | Endophytes/ saprobies/ pathogens | Pigmented                 | Septate           | MW866522  | MZ275253  | [42,277]  |
| A. arbusti                     | CBS 596. 93    | Endophytes                       | Pigmented                 | Septate           | MH862447  | MH874095  | [278]     |
| A. burnsii                     | L1             | Endophytes/ pathogens            | Pigmented                 | Septate           | MZ067801  | N/A       | [257]     |
| Bambusicola massarinia         | MFLUCC 11-0389 | Saprobies                        | Pigmented                 | Septate           | NR_121548 | NG_058658 | [279]     |
| Bipolaris drechsleri           | CBS 136207     | Endophytes/ pathogens            | Pigmented                 | Aseptate          | MH866089  | MH877614  | [42,110]  |
| B. zeae                        | CBS 127735     | Endophytes                       | Pigmented                 | Aseptate          | MH864763  | MH876203  | [110,280] |
| Curvularia aeria               | CBS 533. 70    | Endophytes                       | Pigmented                 | Septate           | MH859836  | MH871614  | [281]     |
| C. intermedia                  | C34            | Endophytes                       | Pigmented                 | Septate           | MK304232  | N/A       | [110,282] |
| Edenia gomezpompae             | CBS 124106     | Endophytes/ pathogens            | Hyaline                   | Aseptate          | MH863351  | MH874875  | [110,253] |
| Kirschsteiniotelia lignicola   | MFLUCC10-0036  | Saprobies                        | Pigmented                 | Septate           | HQ441567  | HQ441568  | [283]     |
| Lophiostoma corticola          | FeC108         | Endophytes                       | No asexual morph recorded |                   | MW446986  | N/A       | [274]     |
| Massarina pandanicola          | MFLUCC 17-0596 | Endophytes                       | Hyaline                   | Aseptate          | MG646958  | NG_064488 | [257]     |
| Neoplatysporoides aloicola     | CPC 24435      | Endophytes                       | Pigmented                 | Septate           | KR476719  | KR476754  | [284]     |
| Paraconiothyrium babiogorensis | CBS 128292     | Endophytes                       | Pigmented                 | Aseptate/ septate | MH864845  | MH876291  | [42,285]  |
| Petrakia irregularis           | CBS 306. 67    | Endophytes                       | Pigmented                 | Septate           | MH858977  | MH870670  | [42,286]  |
| Phomatodes nebulosa            | CBS 503. 75    | Endophytes/ saprobies/ pathogens | Hyaline                   | Aseptate          | GU237875  | GU238115  | [42,161]  |
| Stagonospora nodorum           | CBS 127171     | Endophytes/ pathogens            | Hyaline                   | Aseptate          | MH864458  | MH875898  | [42,287]  |
| Strigulales                    |                |                                  |                           |                   |           |           |           |
| Strigula acuticonidiarum       | HMAS L0138045  | Endophytes                       | Hyaline                   | Septate           | NR_146254 | N/A       | [288]     |
| Valsariales                    |                |                                  |                           |                   |           |           |           |
| Myrmaecium fulvopruinatum      | CFCC 52769     | Pathogens/ Saprobies             | Hyaline                   | Aseptate          | MH458908  | MH458902  | [187]     |
| Venturiales                    |                |                                  |                           |                   |           |           |           |

|                                      |             |                      |                           |                  |           |           |           |
|--------------------------------------|-------------|----------------------|---------------------------|------------------|-----------|-----------|-----------|
| <i>Fusicladium betulae</i>           | R6          | Endophytes           | Pigmented                 | Septate          | AY671908  | N/A       | [289]     |
| <i>Venturia cephalariae</i>          | CBS 372.55  | Pathogens            | No asexual morph recorded |                  | EU035451  | N/A       | [290]     |
| <i>V. fraxini</i>                    | CBS 374. 55 | Endophytes           | Pigmented                 | Septate/Aseptate | KC464358  | MH869056  | [291]     |
| <i>V. orni</i>                       | CBS 140924  | Endophytes           | Pigmented                 | Septate/Aseptate | NR_170751 | NG_070941 | [291]     |
| <b><i>Tubeufiales</i> (outgroup)</b> |             |                      |                           |                  |           |           |           |
| <i>Helicomyces roseus</i>            | CBS 283.51  | Saprobies/endophytes | Hyaline                   | Septate          | AY916464  | AY856881  | [292,293] |
| <i>Helicosporium guianense</i>       | CBS 269.52  | Saprobies            | Hyaline                   | Septate          | AY916487  | AY856893  | [292]     |

“N/A” sequences data are not available, ? : Problematic synonyms.
